# Supplementary material for: Optimality Conditions for Cell-Fate Heterogeneity That Maximize the Effects of Growth Factors in PC12 Cells
Source: PubMed Central journal article supplement (PMC3828137; doi:10.1371/journal.pcbi.1003320), 2013-11-14
Supplement: pcbi.1003320.s008.pdf [file pcbi.1003320.s008.pdf]

| <b>Experiment 1</b> |          |          |        |          |         |        |       |       |       |
|---------------------|----------|----------|--------|----------|---------|--------|-------|-------|-------|
| Serum               | Stimulus | $\mu$    | $k_1$  | $k_2$    | $d_1$   | $d_2$  | $x_0$ | $y_0$ | $z_0$ |
| High                | Control  | 0.316    | 0.0363 | 0.491    | 0.00811 | 2.07   | 20.0  | 0.1   | 2.0   |
|                     | EGF      | 0.339    | 0.121  | 3.79     | 0.0263  | 0.254  | 30.0  | 0.2   | 1.0   |
|                     | NGF      | 0.549    | 0.518  | 2.84E-04 | 0.00108 | 0.105  | 20.0  | 0.1   | 1.0   |
| Low                 | Control  | 0.0766   | 0.0120 | 7.42E-04 | 0.0713  | 0.0721 | 35.0  | 0.05  | 5.0   |
|                     | EGF      | 0.154    | 0.0725 | 0.00156  | 0.0361  | 0.169  | 50.0  | 0.2   | 7.0   |
|                     | NGF      | 0.262    | 0.481  | 2.01E-04 | 0.00121 | 0.0341 | 20.0  | 0.5   | 3.0   |
| Free                | Control  | 1.10E-04 | 0.0424 | 4.95E-04 | 0.176   | 0.0360 | 50.0  | 0.3   | 5.0   |
|                     | EGF      | 7.14E-05 | 0.120  | 0.105    | 0.140   | 0.0118 | 30.0  | 0.05  | 8.0   |
|                     | NGF      | 6.74E-05 | 0.385  | 0.114    | 0.219   | 0.0394 | 35.0  | 0.2   | 5.0   |

  

| <b>Experiment 2</b> |          |          |        |          |         |          |       |       |       |
|---------------------|----------|----------|--------|----------|---------|----------|-------|-------|-------|
| Serum               | Stimulus | $\mu$    | $k_1$  | $k_2$    | $d_1$   | $d_2$    | $x_0$ | $y_0$ | $z_0$ |
| High                | CTL      | 0.352    | 0.0240 | 0.00243  | 0.0561  | 0.345    | 30.0  | 0.3   | 1.0   |
|                     | EGF      | 0.386    | 0.0739 | 0.00226  | 0.00488 | 0.515    | 20.0  | 1.0   | 1.0   |
|                     | NGF      | 0.751    | 0.592  | 4.93E-04 | 0.128   | 9.77E-04 | 15.0  | 0.4   | 2.0   |
| Low                 | CTL      | 0.0860   | 0.0175 | 5.50E-04 | 0.100   | 0.0135   | 40.0  | 1.0   | 5.0   |
|                     | EGF      | 0.186    | 0.142  | 2.27E-04 | 0.00356 | 0.227    | 40.0  | 0.5   | 7.0   |
|                     | NGF      | 0.327    | 0.601  | 5.98E-04 | 0.111   | 7.30E-04 | 40.0  | 1.0   | 3.0   |
| Free                | CTL      | 6.79E-05 | 0.140  | 0.210    | 0.168   | 0.00127  | 40.0  | 0.5   | 5.0   |
|                     | EGF      | 0.196    | 0.304  | 3.11E-04 | 0.00440 | 0.438    | 45.0  | 2.0   | 1.0   |
|                     | NGF      | 0.183    | 0.600  | 0.0438   | 0.0307  | 0.0884   | 35.0  | 0.5   | 5.0   |

  

| <b>Experiment 3</b> |          |        |        |          |          |          |       |       |       |
|---------------------|----------|--------|--------|----------|----------|----------|-------|-------|-------|
| Serum               | Stimulus | $\mu$  | $k_1$  | $k_2$    | $d_1$    | $d_2$    | $x_0$ | $y_0$ | $z_0$ |
| High                | CTL      | 0.531  | 0.0251 | 0.00204  | 0.0370   | 5.39E-04 | 60.0  | 3.0   | 1.0   |
|                     | EGF      | 0.557  | 0.0802 | 1.11     | 0.0329   | 0.00636  | 50.0  | 1.0   | 2.0   |
|                     | NGF      | 0.674  | 0.682  | 0.0276   | 0.0167   | 0.0324   | 50.0  | 10.0  | 6.0   |
| Low                 | CTL      | 0.181  | 0.0155 | 0.0608   | 0.0709   | 4.16E-04 | 55.0  | 0.0   | 3.0   |
|                     | EGF      | 0.233  | 0.0874 | 2.07E-04 | 0.0164   | 0.416    | 50.0  | 1.0   | 0.0   |
|                     | NGF      | 0.501  | 0.769  | 6.87E-06 | 0.0346   | 0.0363   | 35.0  | 10.0  | 0.0   |
| Free                | CTL      | 0.0569 | 0.0631 | 4.58E-04 | 0.147    | 1.40E-04 | 60.0  | 2.0   | 1.0   |
|                     | EGF      | 0.177  | 0.221  | 4.95E-04 | 0.0605   | 0.507    | 65.0  | 1.0   | 1.0   |
|                     | NGF      | 0.0301 | 0.368  | 8.91E-05 | 1.51E-05 | 0.178    | 80.0  | 5.0   | 0.1   |

  

| <b>Experiment 4</b> |          |          |        |          |          |          |       |       |       |
|---------------------|----------|----------|--------|----------|----------|----------|-------|-------|-------|
| Serum               | Stimulus | $\mu$    | $k_1$  | $k_2$    | $d_1$    | $d_2$    | $x_0$ | $y_0$ | $z_0$ |
| High                | CTL      | 0.497    | 0.0682 | 0.563    | 0.0363   | 0.00305  | 20.0  | 0.0   | 0.0   |
|                     | EGF      | 0.726    | 0.0613 | 6.93E-04 | 0.0521   | 2.42E-04 | 15.0  | 0.0   | 0.5   |
|                     | NGF      | 0.300    | 0.425  | 0.0229   | 0.0817   | 2.80E-05 | 30.0  | 0.0   | 1.0   |
| Low                 | CTL      | 0.307    | 0.0579 | 0.00187  | 0.0846   | 0.859    | 40.0  | 0.0   | 0.0   |
|                     | EGF      | 0.532    | 0.0859 | 2.96E-04 | 0.135    | 1.68E-04 | 25.0  | 0.5   | 1.0   |
|                     | NGF      | 0.513    | 0.799  | 4.44E-05 | 0.0384   | 0.0334   | 30.0  | 0.0   | 1.0   |
| Free                | CTL      | 0.239    | 0.278  | 2.73E-04 | 0.0125   | 0.963    | 55.0  | 0.0   | 3.0   |
|                     | EGF      | 0.178    | 0.306  | 9.69E-05 | 1.74E-05 | 0.590    | 50.0  | 2.0   | 0.0   |
|                     | NGF      | 7.18E-05 | 1.36   | 0.468    | 0.00253  | 0.142    | 25.0  | 20.0  | 1.0   |
